# Supplementary material
Source: publisher site journal article supplement (https://www.dovepress.com/article/448253)
Supplement: Supplementary file 1 [file get_supplementary_file.php]

Supplementary Table 1 The Antibiotic susceptibility of 19 common antimicrobial agents.

| ID | Antimicrobials                | Resistance rates | BJ17-0111 | BJ17-0103 | BJ17-0106 | BJ17-0107 | BJ17-0100 | BJ17-0120 | BJ17-0104 | BJ17-0110 | BJ17-0119 | BJ17-0121 | BJ17-0112 | BJ17-0115 | BJ17-0116 | BJ17-0118 | BJ17-0109 | BJ17-0108 | BJ17-0102 | BJ17-0114 | BJ17-0113 | BJ17-0117 |
|----|-------------------------------|------------------|-----------|-----------|-----------|-----------|-----------|-----------|-----------|-----------|-----------|-----------|-----------|-----------|-----------|-----------|-----------|-----------|-----------|-----------|-----------|-----------|
| 1  | Meropenem                     | 35%              | R>=16     | R>=16     | R>=16     | R>=16     | R>=16     | R>=16     | S<=1      | R>=16     | S<=1      |
| 2  | Imipenem                      | 35%              | R>=16     | R>=16     | R>=16     | R>=16     | R>=16     | R>=16     | S<=1      | R>=16     | S<=1      |
| 3  | Gentamicin                    | 50%              | R>=16     | S<=1      | S<=1      | I 4       | I 4       | S<=1      | R>=16     | R>=16     | S<=1      | S<=1      | S<=1      | S<=1      | I 4       |
| 4  | Amikacin                      | 45%              | R>=64     | S<=4      | S<=4      | S<=4      | S<=4      | S<=4      | S<=4      | R>=64     | S<=4      | S<=4      | S<=4      | S<=4      | S<=4      |
| 5  | Levofloxacin                  | 80%              | R>=8      | S<=0.12   | S<=0.12   | I 1       | S<=0.12   | R>=8      |
| 6  | Ciprofloxacin                 | 85%              | R>=4      | S<=0.06   | S<=0.06   | R 1       | S<=0.06   | R>=4      |
| 7  | Nitrofurantoin                | 75%              | R>=128    | I 64      | S 32      | R>=128    | R>=128    | I 64      | I 64      | R>=128    | R>=128    | I 64      |
| 8  | Ampicillin/Sulbactam          | 70%              | R>=64     | I 8       | R>=64     | R>=64     | R>=64     | R>=64     | R>=64     | R>=64     | S<=2      | I 8       | I 16      | S<=2      | I 8       |
| 9  | Piperacillin/clavulanic acid  | 45%              | R>=128    | R>=128    | R>=128    | R>=128    | R>=128    | R>=128    | I 16      | R>=128    | S<=4      | R>=128    | S<=4      | S<=4      | I 16      | I 64      | R>=128    | S<=4      | S<=4      | I 16      | S<=4      | I 16      |
| 10 | Ticarcillin/Clavulanic acid   | 70%              | R>=128    | S<=4      | R>=128    | R>=128    | R>=128    | R>=128    | R>=128    | R>=128    | S<=4      | S<=4      | S<=4      | S<=4      | I 64      |
| 11 | Cefoxitin                     | 60%              | R>=32     | R>=32     | R>=32     | R>=32     | R>=32     | R>=32     | I 16      | R>=32     | R>=32     | S<=8      | R>=32     | R>=32     | R>=32     | I 16      | R>=32     | S<=8      | S<=8      | S<=8      | S<=8      | S<=8      |
| 12 | Cefepime                      | 55%              | R>=32     | S<=2      | R>=32     | I 8       | I 8       | I 8       | R>=32     | R>=32     | S<=2      | S<=2      | S<=2      | S<=2      | S<=2      |
| 13 | Ceftriaxone                   | 75%              | R>=64     | S<=1      | R>=64     | R>=64     | R>=64     | R>=64     | R>=64     | R>=64     | S<=1      | S<=1      | S<=1      | S<=1      | R>=64     |
| 14 | Cefuroxime                    | 80%              | R>=32     | S<=8      | S<=8      | S<=8      | S<=8      | R>=32     |
| 15 | Ceftazidime                   | 65%              | R>=32     | R>=32     | R>=32     | R>=32     | R>=32     | R>=32     | S<=4      | R>=32     | S<=4      | R>=32     | I 8       | R 16      | R>=32     | R>=32     | R>=32     | S<=4      | S<=4      | S<=4      | S<=4      | R 16      |
| 16 | Cefoperazone/Sulbactam        | 50%              | R>=64     | S<=2      | R>=64     | S 16      | I 32      | I 32      | I 32      | R>=64     | S<=2      | S<=2      | S<=2      | S<=2      | S 16      |
| 17 | Minocycline                   | 35%              | S<=4      | S<=4      | S<=4      | S<=4      | S<=4      | S<=4      | R>=16     | S<=4      | S<=4      | S<=4      | R>=16     | R>=16     | R>=16     | R>=16     | R>=16     | S<=4      | S<=4      | S<=4      | S<=4      | R>=16     |
| 18 | Trimethoprim/Sulfamethoxazole | 60%              | R>=8      | R>=8      | S<=0.5    | S<=0.5    | R>=8      | R>=8      | R>=8      | S<=0.5    | S<=0.5    | R>=8      | R>=8      | R>=8      | S 2       | R>=8      | R>=8      | S<=0.5    | S<=0.5    | R>=8      | S<=0.5    | R>=8      |
| 19 | Polymixin B                   | 10%              | S<=2      | S<=2      | S<=2      | S<=2      | R>=4      | R>=4      | S<=2      |

Abbreviations: R, Resistant; I, Intermediate; S, Susceptible

**Supplementary Table 2 Statistics of reads mapping to reference genome (NZ\_CP045263.1) and genome assemblies of 20 strains**

| ID | Strains   | Numreads | Covbases | Coverage | Meandepth | Meanbaseq | Meanmapq | Contigs | Assembly length | GC%   | N50       | BioSample    | Assembly        |
|----|-----------|----------|----------|----------|-----------|-----------|----------|---------|-----------------|-------|-----------|--------------|-----------------|
| 1  | BJ17-0100 | 7495273  | 5356377  | 95.6687  | 198.414   | 35.7      | 58.2     | 45      | 6085948         | 56.47 | 1,300,316 | SAMN27593772 | GCA_023700655.1 |
| 2  | BJ17-0102 | 7137349  | 4900546  | 87.5272  | 188.755   | 35.5      | 59       | 586     | 5663834         | 56.99 | 163,390   | SAMN27593773 | GCA_023700705.1 |
| 3  | BJ17-0103 | 8092994  | 5585265  | 99.7568  | 215.332   | 35.5      | 58.2     | 6       | 5821712         | 57.04 | 5,681,602 | SAMN27593774 | GCA_023700625.1 |
| 4  | BJ17-0104 | 8632767  | 5315912  | 94.9459  | 229.552   | 35.5      | 58.6     | 14      | 5661479         | 57.23 | 5,244,136 | SAMN27593775 | GCA_023700645.1 |
| 5  | BJ17-0106 | 8483965  | 5546153  | 99.0582  | 225.431   | 35.4      | 58.5     | 36      | 5724892         | 57.07 | 1,597,484 | SAMN27593777 | GCA_023700605.1 |
| 6  | BJ17-0107 | 9359909  | 5553958  | 99.1976  | 248.447   | 35.7      | 58.5     | 53      | 5801768         | 56.98 | 1,491,662 | SAMN27593778 | GCA_023700565.1 |
| 7  | BJ17-0108 | 9297377  | 4922857  | 87.9257  | 246.727   | 35.6      | 59.1     | 2       | 5469540         | 57.35 | 5,295,893 | SAMN27593779 | GCA_023700505.1 |
| 8  | BJ17-0109 | 8555487  | 4893107  | 87.3943  | 226.743   | 35.7      | 59.1     | 2       | 5524686         | 57.25 | 5,292,574 | SAMN27593780 | GCA_023700585.1 |
| 9  | BJ17-0110 | 7445369  | 5381852  | 96.1237  | 198.009   | 35.6      | 58.3     | 3       | 5748938         | 57.22 | 5,596,427 | SAMN27593781 | GCA_023700545.1 |
| 10 | BJ17-0111 | 9008353  | 5556052  | 99.235   | 239.835   | 35.6      | 58.3     | 6       | 5778903         | 57.10 | 5,638,791 | SAMN27593782 | GCA_023700525.1 |
| 11 | BJ17-0112 | 7460245  | 4933461  | 88.1151  | 197.519   | 35.6      | 58.8     | 4       | 5507922         | 57.30 | 5,288,099 | SAMN27593783 | GCA_023700445.1 |
| 12 | BJ17-0113 | 13260106 | 4973246  | 88.8257  | 351.851   | 35.8      | 59.3     | 1       | 5458212         | 57.44 | 5,458,212 | SAMN27593784 | GCA_023242905.1 |
| 13 | BJ17-0114 | 6173167  | 4908916  | 87.6767  | 163.625   | 36        | 58.9     | 17      | 5698316         | 56.74 | 5,161,006 | SAMN27593785 | GCA_023700405.1 |
| 14 | BJ17-0115 | 8207977  | 4934198  | 88.1282  | 217.36    | 35.5      | 58.8     | 4       | 5506183         | 57.30 | 5,288,099 | SAMN27593786 | GCA_023700425.1 |
| 15 | BJ17-0116 | 8495127  | 4837776  | 86.4061  | 224.927   | 35.7      | 58.8     | 4       | 5376790         | 57.26 | 5,156,958 | SAMN27593787 | GCA_023700465.1 |
| 16 | BJ17-0117 | 8381255  | 5012746  | 89.5312  | 221.911   | 35.6      | 59.1     | 6       | 5665380         | 57.11 | 5,377,248 | SAMN27593788 | GCA_023700335.1 |
| 17 | BJ17-0118 | 7476150  | 4987293  | 89.0766  | 198.104   | 35.6      | 58.7     | 37      | 5946112         | 56.60 | 2,549,204 | SAMN27593789 | GCA_023700325.1 |
| 18 | BJ17-0119 | 7633643  | 5409744  | 96.6218  | 202.862   | 35.6      | 58.4     | 7       | 5963168         | 56.80 | 5,497,432 | SAMN27593790 | GCA_023700415.1 |
| 19 | BJ17-0120 | 7546447  | 5332825  | 95.248   | 200.041   | 35.6      | 58.3     | 13      | 6089139         | 56.46 | 5,482,102 | SAMN27593791 | GCA_023700365.1 |
| 20 | BJ17-0121 | 7313232  | 5233278  | 93.47    | 194.773   | 35.6      | 59       | 7       | 5573943         | 57.16 | 5,333,368 | SAMN27593792 | GCA_023700375.1 |
